# Supplementary material for: Factors Influencing the Healthcare Workers’ Willingness to Receive the COVID-19 Booster Dose in Tuscany (Italy)
Source: MDPI journal article supplement (doi:10.3390/vaccines11121751), 2023-11-24
Supplement: s1 [file s1]

## Supplementary Material

**Table S1.** STROBE Statement-Checklist.

|                              | Item No | Recommendation                                                                                                                                                                                        | Page No |
|------------------------------|---------|-------------------------------------------------------------------------------------------------------------------------------------------------------------------------------------------------------|---------|
| Title and abstract           | 1       | (a) Indicate the study’s design with a commonly used term in the title or the abstract                                                                                                                | 1       |
|                              |         | (b) Provide in the abstract an informative and balanced summary of what was done and what was found                                                                                                   | 1       |
| Introduction                 |         |                                                                                                                                                                                                       |         |
| Background/rationale         | 2       | Explain the scientific background and rationale for the investigation being reported                                                                                                                  | 1, 2    |
| Objectives                   | 3       | State specific objectives, including any prespecified hypotheses                                                                                                                                      | 2       |
| Methods                      |         |                                                                                                                                                                                                       |         |
| Study design                 | 4       | Present key elements of study design early in the paper                                                                                                                                               | 2       |
| Setting                      | 5       | Describe the setting, locations, and relevant dates, including periods of recruitment, exposure, follow-up, and data collection                                                                       | 2, 3    |
| Participants                 | 6       | (a) Give the eligibility criteria, and the sources and methods of selection of participants                                                                                                           | 3       |
| Variables                    | 7       | Clearly define all outcomes, exposures, predictors, potential confounders, and effect modifiers. Give diagnostic criteria, if applicable                                                              | 3       |
| Data sources/<br>measurement | 8*      | For each variable of interest, give sources of data and details of methods of assessment (measurement). Describe comparability of assessment methods if there is more than one group                  | 3       |
| Bias                         | 9       | Describe any efforts to address potential sources of bias                                                                                                                                             | 3       |
| Study size                   | 10      | Explain how the study size was arrived at                                                                                                                                                             | 2, 3    |
| Quantitative variables       | 11      | Explain how quantitative variables were handled in the analyses. If applicable, describe which groupings were chosen and why                                                                          | 3       |
| Statistical methods          | 12      | (a) Describe all statistical methods, including those used to control for confounding                                                                                                                 | 3       |
|                              |         | (b) Describe any methods used to examine subgroups and interactions                                                                                                                                   | 3       |
|                              |         | (c) Explain how missing data were addressed                                                                                                                                                           | 3       |
|                              |         | (d) If applicable, describe analytical methods taking account of sampling strategy                                                                                                                    | 2, 3    |
|                              |         | (e) Describe any sensitivity analyses                                                                                                                                                                 | -       |
| Results                      |         |                                                                                                                                                                                                       |         |
| Participants                 | 13*     | (a) Report numbers of individuals at each stage of study —e.g., numbers potentially eligible, examined for eligibility, confirmed eligible, included in the study, completing follow-up, and analysed | 3       |
|                              |         | (b) Give reasons for non-participation at each stage                                                                                                                                                  | 3       |

|                          |     |                                                                                                                                                                                                                |        |
|--------------------------|-----|----------------------------------------------------------------------------------------------------------------------------------------------------------------------------------------------------------------|--------|
|                          |     | (c) Consider use of a flow diagram                                                                                                                                                                             | -      |
| Descriptive data         | 14* | (a) Give characteristics of study participants (e.g., demographic, clinical, social) and information on exposures and potential confounders                                                                    | 3, 4   |
|                          |     | (b) Indicate number of participants with missing data for each variable of interest                                                                                                                            | -      |
| Outcome data             | 15* | Report numbers of outcome events or summary measures                                                                                                                                                           | 5-9    |
| Main results             | 16  | (a) Give unadjusted estimates and, if applicable, confounder-adjusted estimates and their precision (e.g., 95% confidence interval). Make clear which confounders were adjusted for and why they were included | 5-9    |
|                          |     | (b) Report category boundaries when continuous variables were categorized                                                                                                                                      | -      |
|                          |     | (c) If relevant, consider translating estimates of relative risk into absolute risk for a meaningful time period                                                                                               | -      |
| Other analyses           | 17  | Report other analyses done—e.g., analyses of subgroups and interactions, and sensitivity analyses                                                                                                              | 5-9    |
| <b>Discussion</b>        |     |                                                                                                                                                                                                                |        |
| Key results              | 18  | Summarise key results with reference to study objectives                                                                                                                                                       | 10, 11 |
| Limitations              | 19  | Discuss limitations of the study, taking into account sources of potential bias or imprecision. Discuss both direction and magnitude of any potential bias                                                     | 11     |
| Interpretation           | 20  | Give a cautious overall interpretation of results considering objectives, limitations, multiplicity of analyses, results from similar studies, and other relevant evidence                                     | 11, 12 |
| Generalisability         | 21  | Discuss the generalisability (external validity) of the study results                                                                                                                                          | 10, 11 |
| <b>Other information</b> |     |                                                                                                                                                                                                                |        |
| Funding                  | 22  | Give the source of funding and the role of the funders for the present study and, if applicable, for the original study on which the present article is based                                                  | 12     |

\*Give information separately for exposed and unexposed groups.

## Supplementary material S2. Translated questionnaire.

|                                                                                            |                                                 |                                                     |                                                     |
|--------------------------------------------------------------------------------------------|-------------------------------------------------|-----------------------------------------------------|-----------------------------------------------------|
| <b>Which is your Gender?</b>                                                               |                                                 |                                                     |                                                     |
| <input type="checkbox"/> Male                                                              | <input type="checkbox"/> Female                 | <input type="checkbox"/> I prefer not to declare it |                                                     |
| <b>What age group are you in?</b>                                                          |                                                 |                                                     |                                                     |
| <input type="checkbox"/> From 20 to 35 years                                               | <input type="checkbox"/> From 36 to 55 years    | <input type="checkbox"/> From 56 to 75 years        | <input type="checkbox"/> I prefer not to declare it |
| <b>What kind of employee are you?</b>                                                      |                                                 |                                                     |                                                     |
| <input type="checkbox"/> Healthcare workers                                                | <input type="checkbox"/> Non-Healthcare workers | <input type="checkbox"/> I prefer not to declare it |                                                     |
| <b>How long have you been employed by Central Tuscany Local Health Authority (CT-LHA)?</b> |                                                 |                                                     |                                                     |
| <input type="checkbox"/> From 1 to 5 years                                                 | <input type="checkbox"/> From 6 to 15 years     | <input type="checkbox"/> Over 15 years              | <input type="checkbox"/> I prefer not to declare it |

|                                                                                                                                              |                                                 |                                       |                                                      |                                 |                                      |
|----------------------------------------------------------------------------------------------------------------------------------------------|-------------------------------------------------|---------------------------------------|------------------------------------------------------|---------------------------------|--------------------------------------|
| <b>How many doses of COVID-19 vaccine did you receive?</b>                                                                                   |                                                 |                                       |                                                      |                                 |                                      |
| <input type="checkbox"/> None                                                                                                                | <input type="checkbox"/> Only one               | <input type="checkbox"/> Only two     | <input type="checkbox"/> Three                       |                                 |                                      |
| <b>How much do you think the following reasons might influence your decision to undergo the booster dose for COVID-19?</b>                   |                                                 |                                       |                                                      |                                 |                                      |
| <b>Fear of infection</b>                                                                                                                     | <input type="checkbox"/> Very much              | <input type="checkbox"/> Much         | <input type="checkbox"/> Neither much nor little     | <input type="checkbox"/> Little | <input type="checkbox"/> Very Little |
| <b>Fear of infecting others</b>                                                                                                              | <input type="checkbox"/> Very much              | <input type="checkbox"/> Much         | <input type="checkbox"/> Neither much nor little     | <input type="checkbox"/> Little | <input type="checkbox"/> Very Little |
| <b>Obligation</b>                                                                                                                            | <input type="checkbox"/> Very much              | <input type="checkbox"/> Much         | <input type="checkbox"/> Neither much nor little     | <input type="checkbox"/> Little | <input type="checkbox"/> Very Little |
| <b>Not having received the booster dose for COVID-19, how likely do you think it is to:</b>                                                  |                                                 |                                       |                                                      |                                 |                                      |
| <b>Being infected</b>                                                                                                                        | <input type="checkbox"/> Very much              | <input type="checkbox"/> Much         | <input type="checkbox"/> Neither much nor little     | <input type="checkbox"/> Little | <input type="checkbox"/> Very Little |
| <b>Infecting others</b>                                                                                                                      | <input type="checkbox"/> Very much              | <input type="checkbox"/> Much         | <input type="checkbox"/> Neither much nor little     | <input type="checkbox"/> Little | <input type="checkbox"/> Very Little |
| <b>How do you assess the following aspects of the vaccine used in the COVID-19 campaign for the workers in CT-LHA?</b>                       |                                                 |                                       |                                                      |                                 |                                      |
| <b>Efficacy</b>                                                                                                                              | <input type="checkbox"/> Very High              | <input type="checkbox"/> High         | <input type="checkbox"/> Medium                      | <input type="checkbox"/> Low    | <input type="checkbox"/> Very Low    |
| <b>Safety</b>                                                                                                                                | <input type="checkbox"/> Very High              | <input type="checkbox"/> High         | <input type="checkbox"/> Medium                      | <input type="checkbox"/> Low    | <input type="checkbox"/> Very Low    |
| <b>Why would you undergo the booster dose of COVID-19 vaccine?</b>                                                                           |                                                 |                                       |                                                      |                                 |                                      |
| <b>Effective</b>                                                                                                                             | <input type="checkbox"/> Very High              | <input type="checkbox"/> High         | <input type="checkbox"/> Medium                      | <input type="checkbox"/> Low    | <input type="checkbox"/> Very Low    |
| <b>Safe</b>                                                                                                                                  | <input type="checkbox"/> Very High              | <input type="checkbox"/> High         | <input type="checkbox"/> Medium                      | <input type="checkbox"/> Low    | <input type="checkbox"/> Very Low    |
| <b>Updated</b>                                                                                                                               | <input type="checkbox"/> Very High              | <input type="checkbox"/> High         | <input type="checkbox"/> Medium                      | <input type="checkbox"/> Low    | <input type="checkbox"/> Very Low    |
| <b>Which type of COVID--19 vaccine would you choose for the booster dose?</b>                                                                |                                                 |                                       |                                                      |                                 |                                      |
| <input type="checkbox"/> mRNA                                                                                                                | <input type="checkbox"/> Viral Vector           | <input type="checkbox"/> mRNA updated | <input type="checkbox"/> Indifferent                 |                                 |                                      |
| <b>How do you assess the following aspects in the vaccination campaign for employees of CT-LHA?</b>                                          |                                                 |                                       |                                                      |                                 |                                      |
| <b>Quality of communication</b>                                                                                                              | <input type="checkbox"/> Very High              | <input type="checkbox"/> High         | <input type="checkbox"/> Medium                      | <input type="checkbox"/> Low    | <input type="checkbox"/> Very Low    |
| <b>Ease of booking</b>                                                                                                                       | <input type="checkbox"/> Very High              | <input type="checkbox"/> High         | <input type="checkbox"/> Medium                      | <input type="checkbox"/> Low    | <input type="checkbox"/> Very Low    |
| <b>Ease of access to vaccination hubs</b>                                                                                                    | <input type="checkbox"/> Very High              | <input type="checkbox"/> High         | <input type="checkbox"/> Medium                      | <input type="checkbox"/> Low    | <input type="checkbox"/> Very Low    |
| <b>From whom would you like to receive information on the technical and scientific aspects of the booster dose of the COVID--19 vaccine?</b> |                                                 |                                       |                                                      |                                 |                                      |
| <input type="checkbox"/> Corporate Task Force                                                                                                | <input type="checkbox"/> Occupational physician |                                       | <input type="checkbox"/> Ministry of Health Tutorial |                                 |                                      |
| <input type="checkbox"/> General Practitioner                                                                                                | <input type="checkbox"/> Company Intranet       |                                       | <input type="checkbox"/> Other                       |                                 |                                      |
|                                                                                                                                              |                                                 |                                       |                                                      |                                 |                                      |

|                                                                                                                                     |                                                |                                                 |
|-------------------------------------------------------------------------------------------------------------------------------------|------------------------------------------------|-------------------------------------------------|
| <b>From whom would you like to receive information regarding the logistic-organizational aspects of the COVID--19 booster dose?</b> |                                                |                                                 |
| <input type="checkbox"/> Medical Direction                                                                                          | <input type="checkbox"/> Prevention Department | <input type="checkbox"/> Vaccination physicians |
| <input type="checkbox"/> Corporate Task Force                                                                                       | <input type="checkbox"/> Other                 |                                                 |
| <b>What tools would you prefer for disseminating information on the booster dose of the COVID-19 vaccine?</b>                       |                                                |                                                 |
| <input type="checkbox"/> Institutional e-mail                                                                                       | <input type="checkbox"/> WhatsApp              | <input type="checkbox"/> Operating Procedures   |
| <input type="checkbox"/> Internal circulars                                                                                         | <input type="checkbox"/> Other                 |                                                 |

### Supplementary material S3. Missing data analysis.

Analyses were carried out with R version 4.0.1 and the package “finalfit”. Chi-squared test was carried out to evaluate an association between missing/non missing data of the questionnaire item and the variable of interest. Missing are present only on 125 out of 2010 observations.

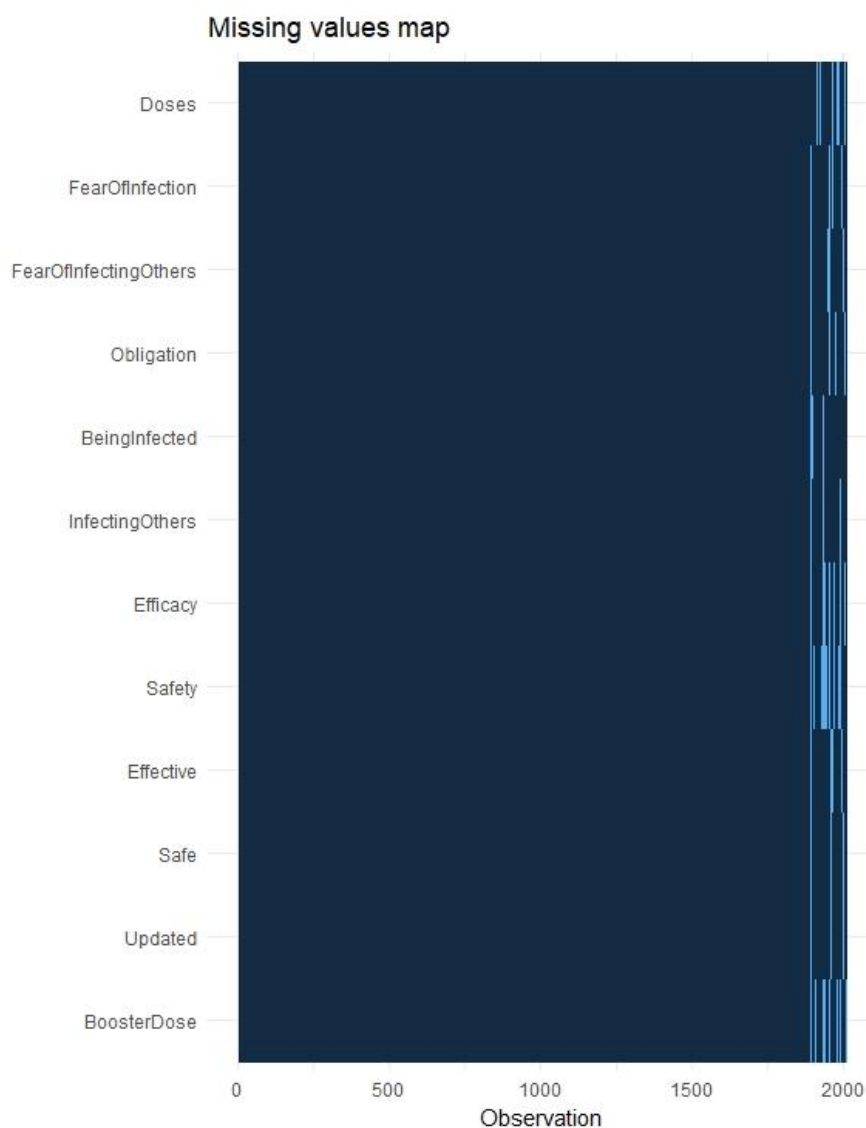

Here, chi-squared test results were reported:

| Missing data analysis: Doses |       | Not missing | Missing  | <i>p</i> |
|------------------------------|-------|-------------|----------|----------|
| Age                          | 20-35 | 100 (100.0) | 0 (0.0)  | 0.440    |
|                              | 36-55 | 1050 (99.0) | 11 (1.0) |          |
|                              | 56-75 | 803 (98.4)  | 13 (1.6) |          |
|                              | N.D.  | 16 (100.0)  | 0 (0.0)  |          |
| Gender                       | F     | 1449 (98.9) | 16 (1.1) | 0.649    |
|                              | M     | 477 (98.6)  | 7 (1.4)  |          |
|                              | N.D.  | 39 (100.0)  |          |          |
| Occupation                   | HCW   | 1375 (98.8) | 16 (1.2) | 0.751    |
|                              | N-HCW | 563 (98.6)  | 8 (1.4)  |          |
|                              | N.D.  | 29 (100.0)  | 0 (0.0)  |          |
| Seniority                    | 1-5   | 107 (100.0) | 0 (0.0)  | 0.639    |
|                              | 6-15  | 521 (98.7)  | 7 (1.3)  |          |
|                              | ≥16   | 1317 (98.7) | 17 (1.3) |          |
|                              | N.D.  | 22 (100.0)  | 0 (0.0)  |          |

| Missing data analysis: Fear of Infection |       | Not missing | Missing  | <i>p</i> |
|------------------------------------------|-------|-------------|----------|----------|
| Age                                      | 20-35 | 100 (100.0) | 0 (0.0)  | 0.692    |
|                                          | 36-55 | 1052 (99.2) | 9 (0.8)  |          |
|                                          | 56-75 | 807 (98.9)  | 9 (1.1)  |          |
|                                          | N.D.  | 16 (100.0)  | 0 (0.0)  |          |
| Gender                                   | F     | 1455 (99.3) | 10 (0.7) | 0.124    |
|                                          | M     | 476 (98.3)  | 8 (1.7)  |          |
|                                          | N.D.  | 39 (100.0)  |          |          |
| Occupation                               | HCW   | 1376 (98.9) | 15 (1.1) | 0.438    |
|                                          | N-HCW | 568 (99.5)  | 3 (0.5)  |          |
|                                          | N.D.  | 29 (100.0)  | 0 (0.0)  |          |
| Seniority                                | 1-5   | 107 (100.0) | 0 (0.0)  | 0.683    |
|                                          | 6-15  | 522 (98.9)  | 6 (1.1)  |          |
|                                          | ≥16   | 1322 (99.1) | 12 (0.9) |          |
|                                          | N.D.  | 22 (100.0)  | 0 (0.0)  |          |

| Missing data analysis: Fear of Infecting Others |       | Not missing | Missing  | <i>p</i> |
|-------------------------------------------------|-------|-------------|----------|----------|
| Age                                             | 20-35 | 100 (100.0) | 0 (0.0)  | 0.632    |
|                                                 | 36-55 | 1053 (99.2) | 8 (0.8)  |          |
|                                                 | 56-75 | 807 (98.9)  | 9 (1.1)  |          |
|                                                 | N.D.  | 16 (100.0)  | 0 (0.0)  |          |
| Gender                                          | F     | 1457 (99.5) | 8 (0.5)  | 0.052    |
|                                                 | M     | 476 (98.3)  | 8 (1.7)  |          |
|                                                 | N.D.  | 39 (100.0)  |          |          |
| Occupation                                      | HCW   | 1378 (99.1) | 13 (0.9) | 0.773    |
|                                                 | N-HCW | 567 (99.3)  | 4 (0.7)  |          |
|                                                 | N.D.  | 29 (100.0)  | 0 (0.0)  |          |
| Seniority                                       | 1-5   | 107 (100.0) | 0 (0.0)  | 0.706    |

|  |      |             |          |
|--|------|-------------|----------|
|  | 6-15 | 524 (99.2)  | 4 (0.8)  |
|  | ≥16  | 1321 (99.0) | 13 (1.0) |
|  | N.D. | 22 (100.0)  | 0 (0.0)  |

| Missing data analysis: Obligation |       | Not missing | Missing  | <i>p</i> |
|-----------------------------------|-------|-------------|----------|----------|
| Age                               | 20-35 | 100 (100.0) | 0 (0.0)  | 0.632    |
|                                   | 36-55 | 1053 (99.2) | 8 (0.8)  |          |
|                                   | 56-75 | 807 (98.9)  | 9 (1.1)  |          |
|                                   | N.D.  | 16 (100.0)  | 0 (0.0)  |          |
| Gender                            | F     | 1456 (99.4) | 9 (0.6)  | 0.083    |
|                                   | M     | 476 (98.3)  | 8 (1.7)  |          |
|                                   | N.D.  | 39 (100.0)  |          |          |
| Occupation                        | HCW   | 1379 (99.1) | 12 (0.9) | 0.830    |
|                                   | N-HCW | 567 (99.3)  | 4 (0.7)  |          |
|                                   | N.D.  | 29 (100.0)  | 0 (0.0)  |          |
| Seniority                         | 1-5   | 107 (100.0) | 0 (0.0)  | 0.753    |
|                                   | 6-15  | 523 (99.1)  | 5 (0.9)  |          |
|                                   | ≥16   | 1322 (99.1) | 12 (0.9) |          |
|                                   | N.D.  | 22 (100.0)  | 0 (0.0)  |          |

| Missing data analysis: Being Infected |       | Not missing | Missing  | <i>p</i> |
|---------------------------------------|-------|-------------|----------|----------|
| Age                                   | 20-35 | 100 (100.0) | 0 (0.0)  | 0.632    |
|                                       | 36-55 | 1053 (99.2) | 8 (0.8)  |          |
|                                       | 56-75 | 807 (98.9)  | 9 (1.1)  |          |
|                                       | N.D.  | 16 (100.0)  | 0 (0.0)  |          |
| Gender                                | F     | 1455 (99.3) | 10 (0.7) | 0.420    |
|                                       | M     | 478 (98.8)  | 6 (1.2)  |          |
|                                       | N.D.  | 39 (100.0)  |          |          |
| Occupation                            | HCW   | 1376 (98.9) | 15 (1.1) | 0.438    |
|                                       | N-HCW | 568 (99.5)  | 3 (0.5)  |          |
|                                       | N.D.  | 29 (100.0)  | 0 (0.0)  |          |
| Seniority                             | 1-5   | 107 (100.0) | 0 (0.0)  | 0.750    |
|                                       | 6-15  | 524 (99.2)  | 4 (0.8)  |          |
|                                       | ≥16   | 1322 (99.1) | 12 (0.9) |          |
|                                       | N.D.  | 22 (100.0)  | 0 (0.0)  |          |

| Missing data analysis: Infecting Others |       | Not missing | Missing  | <i>p</i> |
|-----------------------------------------|-------|-------------|----------|----------|
| Age                                     | 20-35 | 100 (100.0) | 0 (0.0)  | 0.587    |
|                                         | 36-55 | 1049 (98.9) | 12 (1.1) |          |
|                                         | 56-75 | 810 (99.3)  | 6 (0.7)  |          |
|                                         | N.D.  | 16 (100.0)  | 0 (0.0)  |          |
| Gender                                  | F     | 1451 (99.0) | 14 (1.0) | 0.661    |
|                                         | M     | 481 (99.4)  | 3 (0.6)  |          |
|                                         | N.D.  | 39 (100.0)  |          |          |
| Occupation                              | HCW   | 1377 (99.0) | 14 (1.0) | 0.708    |

|           |       |             |          |       |
|-----------|-------|-------------|----------|-------|
|           | N-HCW | 567 (99.3)  | 4 (0.7)  |       |
|           | N.D.  | 29 (100.0)  | 0 (0.0)  |       |
| Seniority | 1-5   | 107 (100.0) | 0 (0.0)  | 0.527 |
|           | 6-15  | 525 (99.4)  | 3 (0.6)  |       |
|           | ≥16   | 1320 (99.0) | 14 (1.0) |       |
|           | N.D.  | 22 (100.0)  | 0 (0.0)  |       |

| Missing data analysis: Efficacy |       | Not missing | Missing  | <i>p</i> |
|---------------------------------|-------|-------------|----------|----------|
| Age                             | 20-35 | 100 (100.0) | 0 (0.0)  | 0.674    |
|                                 | 36-55 | 1047 (98.7) | 14 (1.3) |          |
|                                 | 56-75 | 806 (98.8)  | 10 (1.2) |          |
|                                 | N.D.  | 16 (100.0)  | 0 (0.0)  |          |
| Gender                          | F     | 1449 (98.9) | 16 (1.1) | 0.772    |
|                                 | M     | 478 (98.8)  | 6 (1.2)  |          |
|                                 | N.D.  | 39 (100.0)  |          |          |
| Occupation                      | HCW   | 1375 (98.8) | 16 (1.2) | 0.617    |
|                                 | N-HCW | 562 (98.4)  | 9 (1.6)  |          |
|                                 | N.D.  | 29 (100.0)  | 0 (0.0)  |          |
| Seniority                       | 1-5   | 107 (100.0) | 0 (0.0)  | 0.689    |
|                                 | 6-15  | 522 (98.9)  | 6 (1.1)  |          |
|                                 | ≥16   | 1319 (98.9) | 15 (1.1) |          |
|                                 | N.D.  | 22 (100.0)  | 0 (0.0)  |          |

| Missing data analysis: Safety |       | Not missing | Missing  | <i>p</i> |
|-------------------------------|-------|-------------|----------|----------|
| Age                           | 20-35 | 100 (100.0) | 0 (0.0)  | 0.295    |
|                               | 36-55 | 1047 (98.7) | 14 (1.3) |          |
|                               | 56-75 | 799 (97.9)  | 17 (2.1) |          |
|                               | N.D.  | 16 (100.0)  | 0 (0.0)  |          |
| Gender                        | F     | 1444 (98.6) | 21 (1.4) | 0.454    |
|                               | M     | 474 (97.9)  | 10 (2.1) |          |
|                               | N.D.  | 39 (100.0)  |          |          |
| Occupation                    | HCW   | 1369 (98.4) | 22 (1.6) | 0.792    |
|                               | N-HCW | 562 (98.4)  | 9 (1.6)  |          |
|                               | N.D.  | 29 (100.0)  | 0 (0.0)  |          |
| Seniority                     | 1-5   | 107 (100.0) | 0 (0.0)  | 0.545    |
|                               | 6-15  | 521 (98.7)  | 7 (1.3)  |          |
|                               | ≥16   | 1313 (98.4) | 21 (1.6) |          |
|                               | N.D.  | 22 (100.0)  | 0 (0.0)  |          |

| Missing data analysis: Effective |       | Not missing | Missing | <i>p</i> |
|----------------------------------|-------|-------------|---------|----------|
| Age                              | 20-35 | 99 (99.0)   | 1 (1.0) | 0.931    |
|                                  | 36-55 | 1053 (99.2) | 8 (0.8) |          |
|                                  | 56-75 | 808 (99.0)  | 8 (1.0) |          |
|                                  | N.D.  | 16 (100.0)  | 0 (0.0) |          |
| Gender                           | F     | 1456 (99.4) | 9 (0.6) | 0.332    |

|            |       |             |          |       |
|------------|-------|-------------|----------|-------|
|            | M     | 478 (98.8)  | 6 (1.2)  |       |
|            | N.D.  | 39 (100.0)  |          |       |
| Occupation | HCW   | 1378 (99.1) | 13 (0.9) | 0.868 |
|            | N-HCW | 566 (99.1)  | 5 (0.9)  |       |
|            | N.D.  | 29 (100.0)  | 0 (0.0)  |       |
| Seniority  | 1-5   | 107 (100.0) | 0 (0.0)  | 0.464 |
|            | 6-15  | 525 (99.4)  | 3 (0.6)  |       |
|            | ≥16   | 1319 (98.9) | 15 (1.1) |       |
|            | N.D.  | 22 (100.0)  | 0 (0.0)  |       |

| Missing data analysis: Safe |       | Not missing | Missing  | <i>p</i> |
|-----------------------------|-------|-------------|----------|----------|
| Age                         | 20-35 | 100 (100.0) | 0 (0.0)  | 0.879    |
|                             | 36-55 | 1055 (99.4) | 6 (0.6)  |          |
|                             | 56-75 | 812 (99.5)  | 4 (0.5)  |          |
|                             | N.D.  | 16 (100.0)  | 0 (0.0)  |          |
| Gender                      | F     | 1458 (99.5) | 7 (0.5)  | 0.840    |
|                             | M     | 481 (99.4)  | 3 (0.6)  |          |
|                             | N.D.  | 39 (100.0)  |          |          |
| Occupation                  | HCW   | 1381 (99.3) | 10 (0.7) | 0.310    |
|                             | N-HCW | 570 (99.8)  | 1 (0.2)  |          |
|                             | N.D.  | 29 (100.0)  | 0 (0.0)  |          |
| Seniority                   | 1-5   | 107 (100.0) | 0 (0.0)  | 0.785    |
|                             | 6-15  | 526 (99.6)  | 2 (0.4)  |          |
|                             | ≥16   | 1326 (99.4) | 8 (0.6)  |          |
|                             | N.D.  | 22 (100.0)  | 0 (0.0)  |          |

| Missing data analysis: Updated |       | Not missing | Missing  | <i>p</i> |
|--------------------------------|-------|-------------|----------|----------|
| Age                            | 20-35 | 99 (99.0)   | 1 (1.0)  | 0.446    |
|                                | 36-55 | 1056 (99.5) | 5 (0.5)  |          |
|                                | 56-75 | 807 (98.9)  | 9 (1.1)  |          |
|                                | N.D.  | 16 (100.0)  | 0 (0.0)  |          |
| Gender                         | F     | 1454 (99.2) | 11 (0.8) | 0.831    |
|                                | M     | 481 (99.4)  | 3 (0.6)  |          |
|                                | N.D.  | 39 (100.0)  |          |          |
| Occupation                     | HCW   | 1376 (98.9) | 15 (1.1) | 0.112    |
|                                | N-HCW | 570 (99.8)  | 1 (0.2)  |          |
|                                | N.D.  | 29 (100.0)  | 0 (0.0)  |          |
| Seniority                      | 1-5   | 107 (100.0) | 0 (0.0)  | 0.354    |
|                                | 6-15  | 526 (99.6)  | 2 (0.4)  |          |
|                                | ≥16   | 1320 (99.0) | 14 (1.0) |          |
|                                | N.D.  | 22 (100.0)  | 0 (0.0)  |          |

| Missing data analysis: Booster Dose |       | Not missing | Missing  | <i>p</i> |
|-------------------------------------|-------|-------------|----------|----------|
| Age                                 | 20-35 | 99 (99.0)   | 1 (1.0)  | 0.978    |
|                                     | 36-55 | 1049 (98.9) | 12 (1.1) |          |



|            |       |             |          |       |
|------------|-------|-------------|----------|-------|
|            | 56-75 | 807 (98.9)  | 9 (1.1)  |       |
|            | N.D.  | 16 (100.0)  | 0 (0.0)  |       |
| Gender     | F     | 1447 (98.8) | 18 (1.2) | 0.612 |
|            | M     | 480 (99.2)  | 4 (0.8)  |       |
|            | N.D.  | 39 (100.0)  |          |       |
|            |       |             |          |       |
| Occupation | HCW   | 1377 (99.0) | 14 (1.0) | 0.779 |
|            | N-HCW | 564 (98.8)  | 7 (1.2)  |       |
|            | N.D.  | 29 (100.0)  | 0 (0.0)  |       |
|            |       |             |          |       |
| Seniority  | 1-5   | 106 (99.1)  | 1 (0.9)  | 0.820 |
|            | 6-15  | 521 (98.7)  | 7 (1.3)  |       |
|            | ≥16   | 1322 (99.1) | 12 (0.9) |       |
|            | N.D.  | 22 (100.0)  | 0 (0.0)  |       |
|            |       |             |          |       |
